# Supplementary material for: Protein cross-linking by chlorinated polyamines and transglutamylation stabilizes neutrophil extracellular traps
Source: PubMed Central journal article supplement (PMC5108309; doi:10.1038/cddis.2016.200), 2016-08-11

Supplementary Figure 1

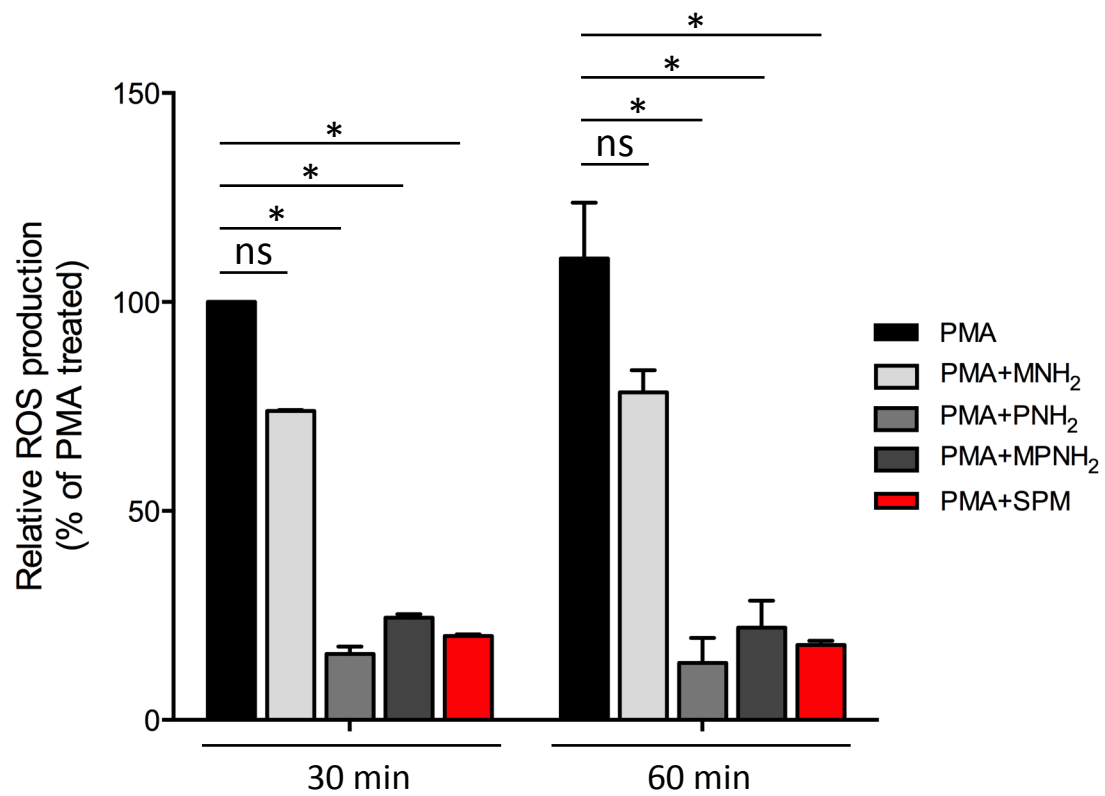

Supplement: cddis2016200x1.pdf [file cddis2016200x1.pdf]
